# Supplementary material for: A turn-on fluorescent probe based onN-(rhodamine-B)-thiolactam-2-n-butane with ionic liquids for selective and sensitive detection of mustard gas stimulant
Source: Royal Society of Chemistry journal article supplement (doi:10.1039/d0ay02248a), 2020-12-29
Supplement: d0ay02248a11.pdf [file d0ay02248a11.pdf]

Table S1 <sup>1</sup>H NMR and FT-IR data of [BMIm]HSO<sub>4</sub>, [BMIm]DCA, [BMIm]PF<sub>6</sub>, [BMIm]BF<sub>4</sub> and [BMIm]NTf<sub>2</sub>

| ILs                    | <sup>1</sup> H NMR, δ                                                                                                   | FT-IR, cm <sup>-1</sup>                                                                                                                                                               |
|------------------------|-------------------------------------------------------------------------------------------------------------------------|---------------------------------------------------------------------------------------------------------------------------------------------------------------------------------------|
| [BMIm]HSO <sub>4</sub> | 0.88 (t, 3H), 1.25 (m, 2H), 1.78 (m, 2H), 3.86 (s, 3H), 4.20 (t, 2H), 7.74 (s, 1H), 7.83 (s, 1H), 9.25 (s, 1H)          | 3442.6 (ν(O-H)); 3148.3, 3102.0 (ν(C-H));, 1573.3, 1446.2 (ν(C≡C)); 1059.5 (ν(O=S)); 847.1 (ν(S-O))                                                                                   |
| [BMIm]DCA              | 0.90 (t, 3H), 1.27 (m, 2H), 1.76 (m, 2H), 3.84 (s, 3H), 4.16 (t, 2H), 7.68 (s, 1H), 7.75 (s, 1H), 9.08 (s, 1H)          | 3150.0, 2961.8 (ν(C-H)); 2242.3, 2201.2, 2140.5 (ν(C≡N)); 1570, 1464 (ν(C-C)); 1384.2 (ν(-C-H))                                                                                       |
| [BMIm]PF <sub>6</sub>  | 0.88 (t, 3H), 1.27 (m, 2H), 1.77 (m, 2H), 3.84 (s, 3H), 4.16 (t, 2H), 7.69 (s, 1H), 7.76 (s, 1H), 9.09 (s, 1H)          | 3172.8 (ν(C-H)); 1576 (ν(C-C));, 1338.9, 1169.8 (ν(C-N)); 837.4 (ν(P-F))                                                                                                              |
| [BMIm]BF <sub>4</sub>  | 0.87-0.92 (t, 3H), 1.27 (m, 2H), 1.76 (m, 2H), 3.83 (s, 3H), 4.13~4.18 (t, 2H), 7.66(s, 1H), 7.75 (s, 1H), 9.08 (s, 1H) | 3000-3800 (ν(C-H)); 1573.2 (ν(C-C)); 838.4 (ν(B-F))                                                                                                                                   |
| [BMIm]NTf <sub>2</sub> | 0.91 (t, 3H), 1.26 (m, 2H), 1.77 (m, 2H), 3.85 (s, 3H), 4.16 (t, 2H), 7.69(s, 1H), 7.77 (s, 1H), 9.10 (s, 1H)           | 3158.8, 2960.0 (ν(C-H)); 1573.5 (ν(C-C)); 1352.4 (ν <sub>asym</sub> (O=S=O)); 1195.5 (ν <sub>asym</sub> (C-F)); 1338.4 (ν <sub>sym</sub> (O=S=O)); 1058.5 (ν <sub>asym</sub> (S-N-S)) |
