# Supplementary material for: A turn-on fluorescent probe based onN-(rhodamine-B)-thiolactam-2-n-butane with ionic liquids for selective and sensitive detection of mustard gas stimulant
Source: Royal Society of Chemistry journal article supplement (doi:10.1039/d0ay02248a), 2020-12-29
Supplement: d0ay02248a12.pdf [file d0ay02248a12.pdf]

Table S2 The structure of [BMIm]HSO<sub>4</sub>, [BMIm]DCA, [BMIm]PF<sub>6</sub>, [BMIm]BF<sub>4</sub> and [BMIm]NTf<sub>2</sub>

| ILs                    | Structure                                                                           |
|------------------------|-------------------------------------------------------------------------------------|
| [BMIm]HSO <sub>4</sub> | 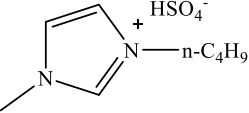  |
| [BMIm]DCA              |   |
| [BMIm]PF <sub>6</sub>  |   |
| [BMIm]BF <sub>4</sub>  |   |
| [BMIm]NTf <sub>2</sub> |  |
