# Supplementary material for: A turn-on fluorescent probe based onN-(rhodamine-B)-thiolactam-2-n-butane with ionic liquids for selective and sensitive detection of mustard gas stimulant
Source: Royal Society of Chemistry journal article supplement (doi:10.1039/d0ay02248a), 2020-12-29
Supplement: d0ay02248a13.pdf [file d0ay02248a13.pdf]

Table S3 Absorbance and fluorescence intensity of SRB-NB/ILs in the presence of 2-CEES or typical interfering substances. The concentration of SRB-NB was  $1.0 \times 10^{-4}$  M, and The concentrations of 2-CEES and typical interfering substances were  $1.0 \times 10^{-3}$  M.

| Substance type            | 2-CEES | Blank   | I      | II     | III    | BUS    | DCE    | EDB    | BI     | DCNP   |
|---------------------------|--------|---------|--------|--------|--------|--------|--------|--------|--------|--------|
| Absorbance                | 0.364± | 0.013±  | 0.037± | 0.041± | 0.049± | 0.042± | 0.034± | 0.025± | 0.019± | 0.031± |
|                           | 0.028  | 0.008   | 0.012  | 0.015  | 0.011  | 0.013  | 0.016  | 0.007  | 0.010  | 0.011  |
| Fluorescence<br>intensity | 512.1± | 8.1±5.6 | 35.5±  | 42.3±  | 67.8±  | 48.5±  | 28.1±  | 17.4±  | 12.6±  | 34.5±  |
|                           | 26.3   |         | 13.7   | 10.2   | 16.4   | 13.7   | 11.5   | 6.8    | 8.9    | 12.5   |
