# Supplementary figures and images for: A turn-on fluorescent probe based onN-(rhodamine-B)-thiolactam-2-n-butane with ionic liquids for selective and sensitive detection of mustard gas stimulant
Source: Royal Society of Chemistry journal article supplement (doi:10.1039/d0ay02248a), 2020-12-29

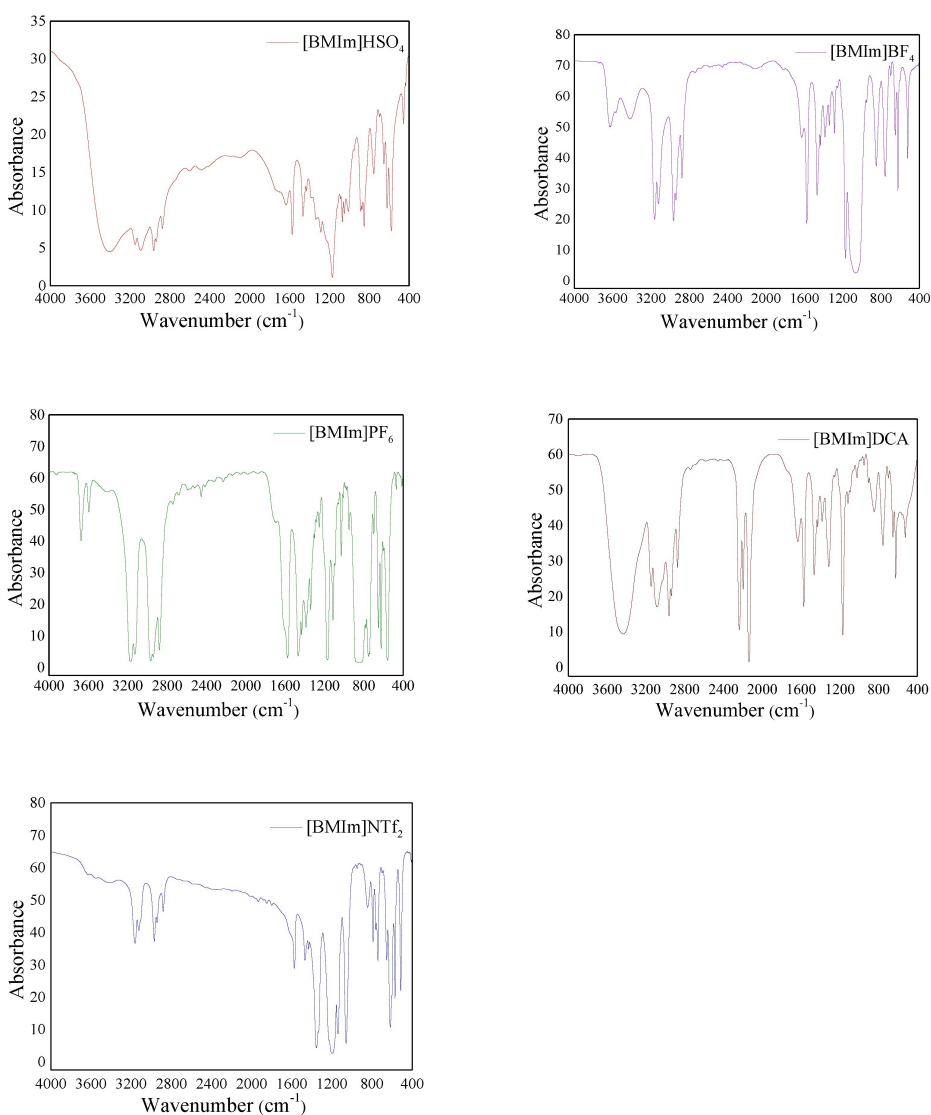

Fig. S1 FT-IR spectra of [BMIm]HSO<sub>4</sub>, [BMIm]DCA, [BMIm]PF<sub>6</sub>, [BMIm]BF<sub>4</sub> and [BMIm]NTf<sub>2</sub>

Supplement: d0ay02248a1.pdf [file d0ay02248a1.pdf]

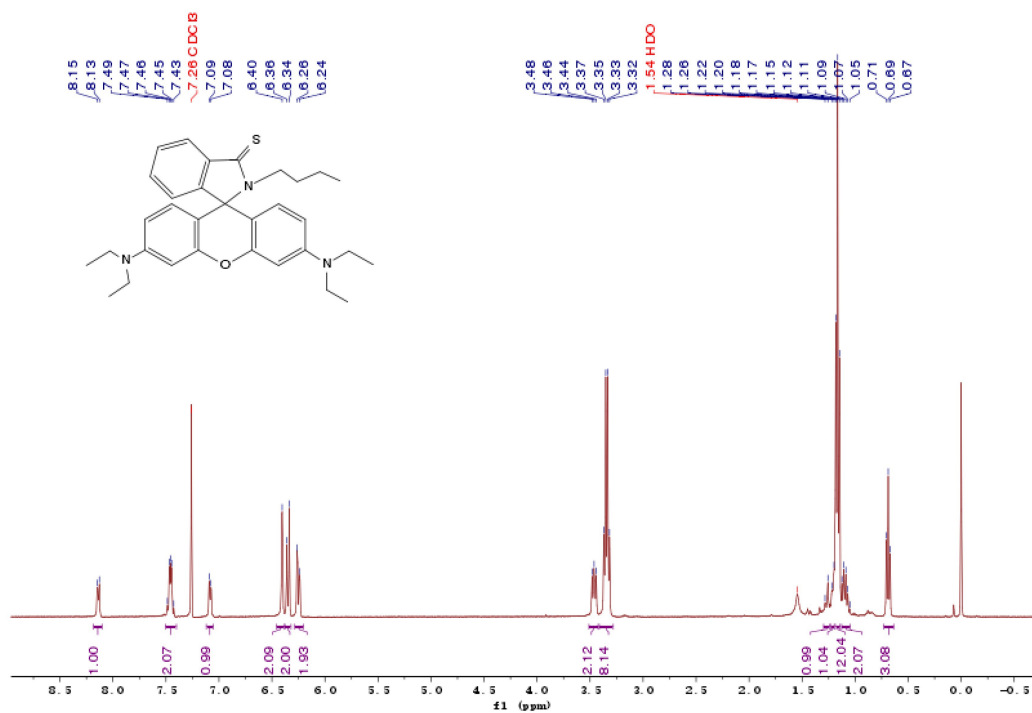

Fig. S9 <sup>1</sup>H NMR spectrum of SRB-NB

Supplement: d0ay02248a10.pdf [file d0ay02248a10.pdf]

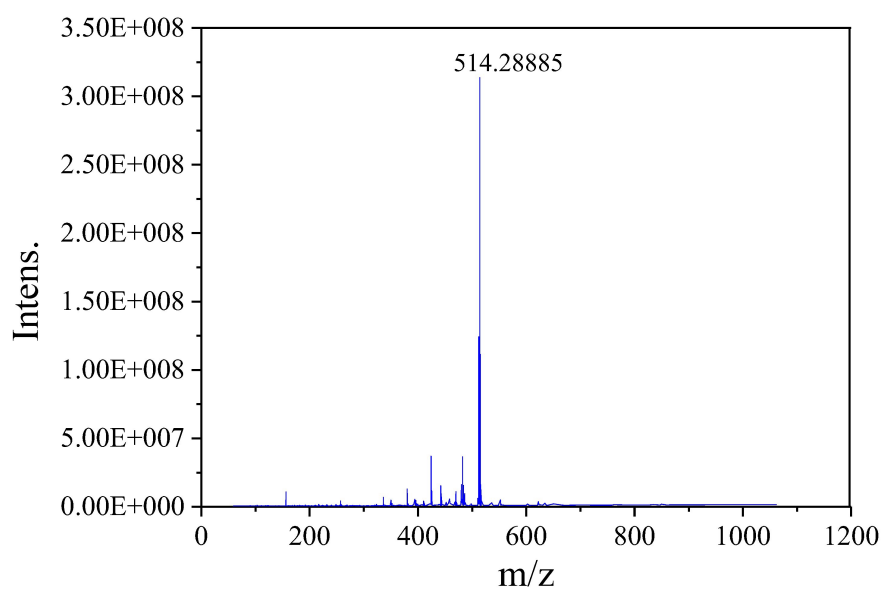

Fig. S10 ESI-MS spectrum of SRB-NB

Supplement: d0ay02248a2.pdf [file d0ay02248a2.pdf]

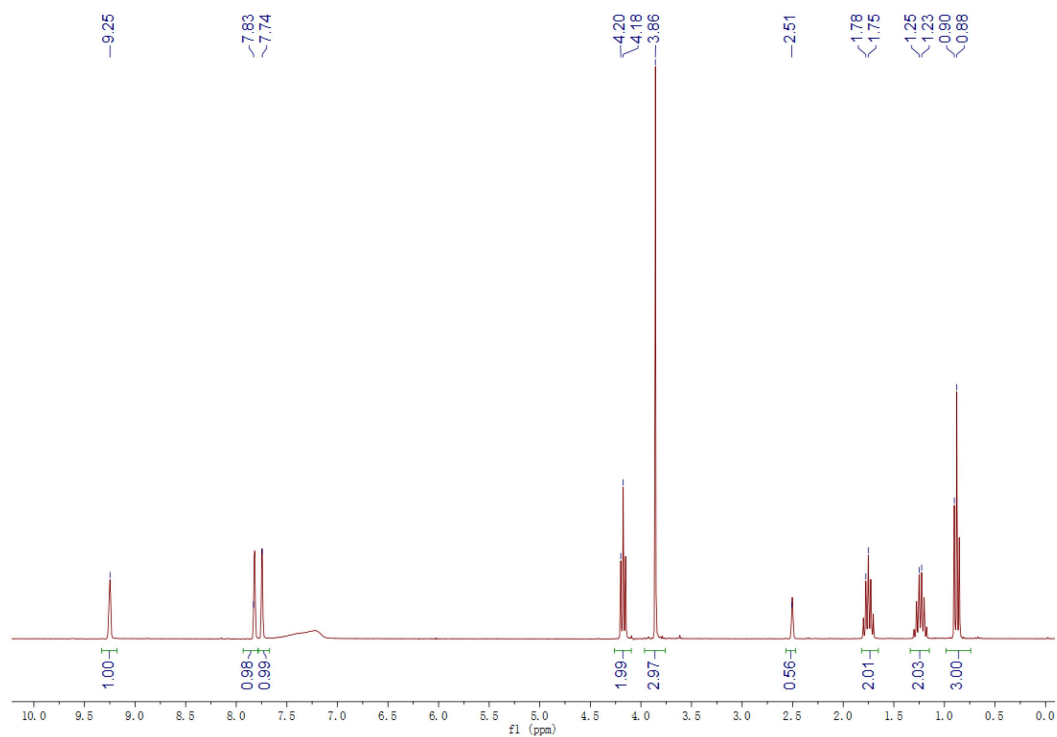

Fig. S2  $^1\text{H}$  NMR spectrum of [BMIm]HSO<sub>4</sub>

Supplement: d0ay02248a3.pdf [file d0ay02248a3.pdf]

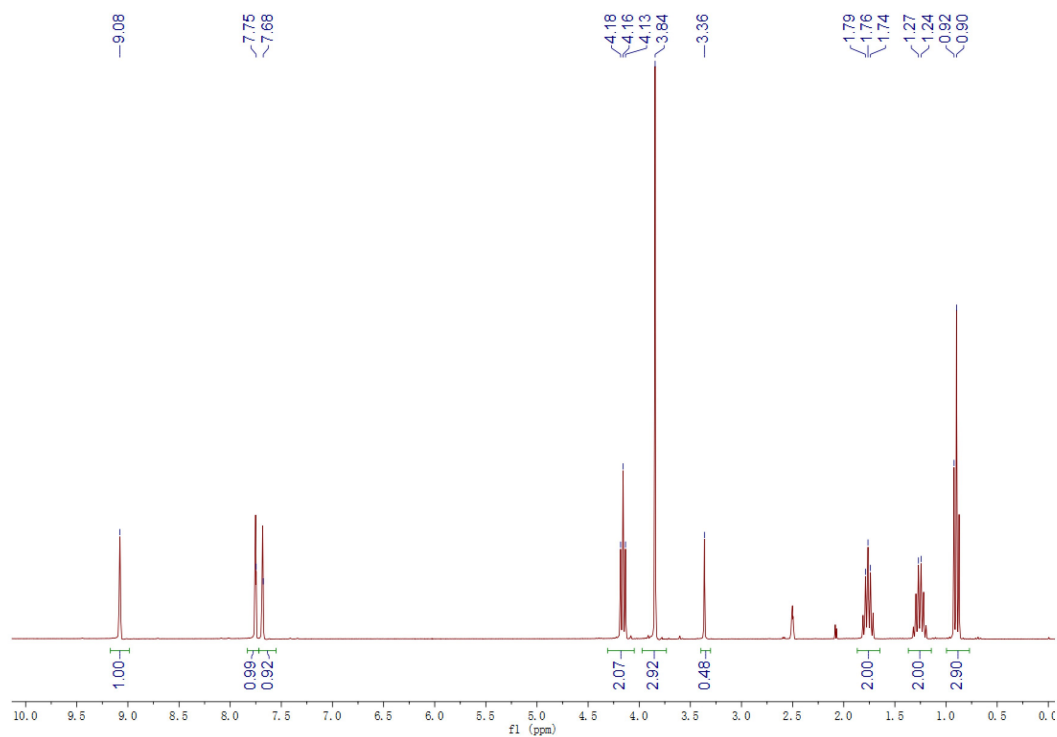

Fig. S3  $^1\text{H}$  NMR spectrum of [BMIm]DCA

Supplement: d0ay02248a4.pdf [file d0ay02248a4.pdf]

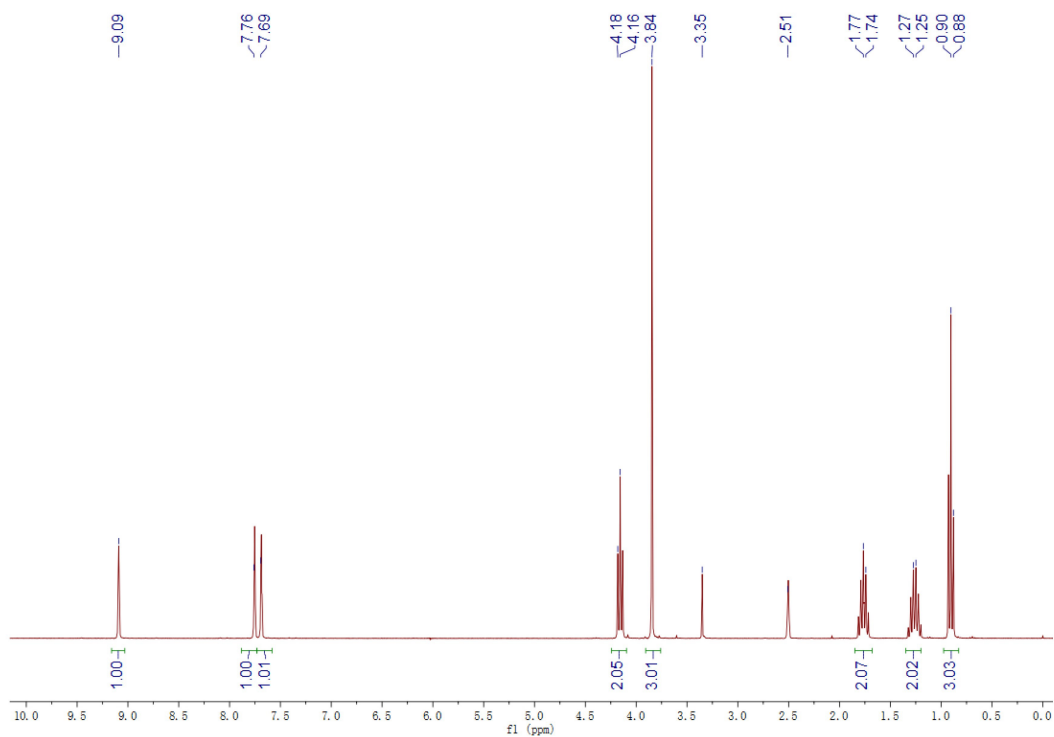

Fig. S4  $^1\text{H}$  NMR spectrum of [BMIm] $\text{PF}_6$

Supplement: d0ay02248a5.pdf [file d0ay02248a5.pdf]

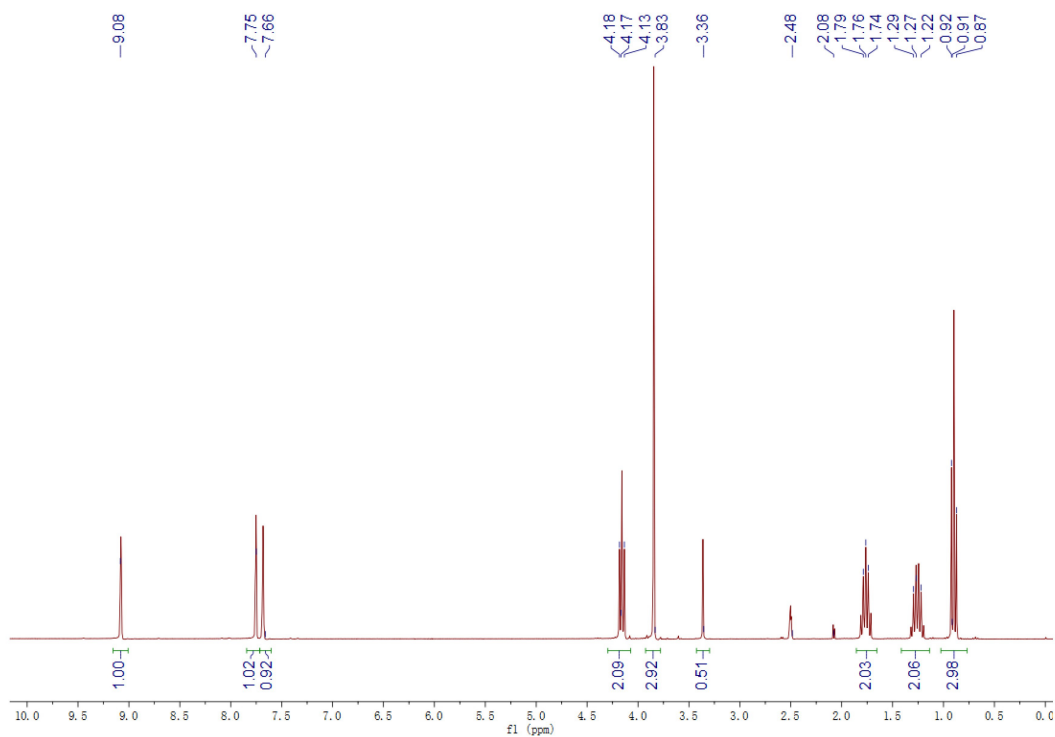

Fig. S5 <sup>1</sup>H NMR spectrum of [BMIm]BF<sub>4</sub>

Supplement: d0ay02248a6.pdf [file d0ay02248a6.pdf]

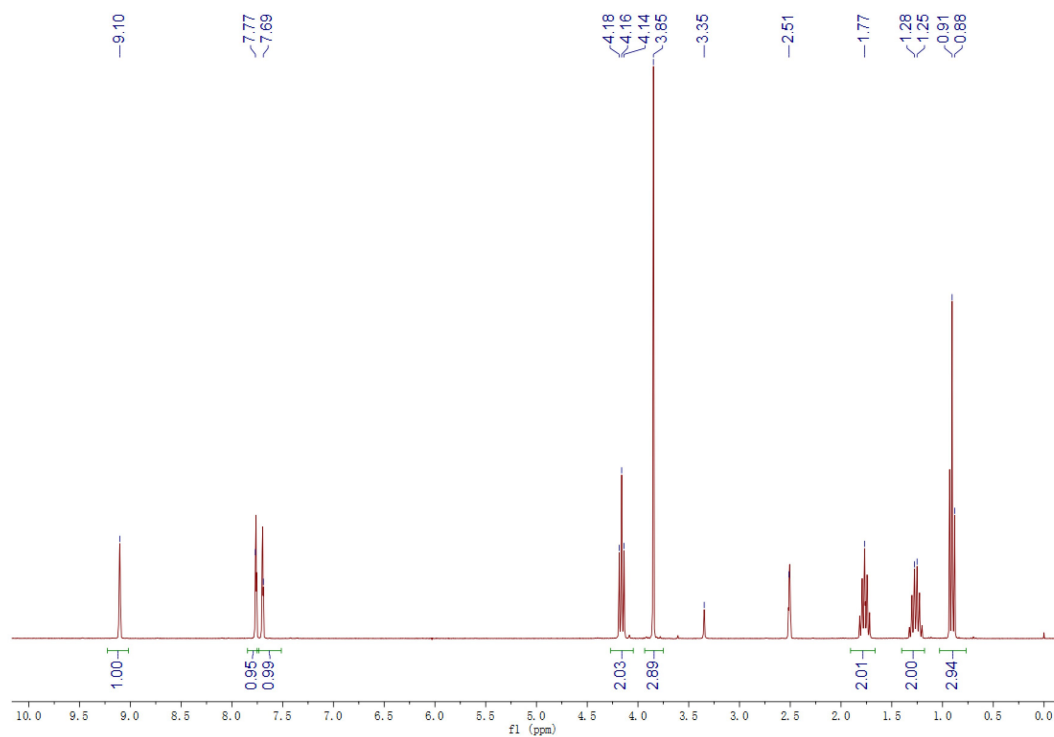

Fig. S6  $^1\text{H}$  NMR spectrum of [BMIm]NTf<sub>2</sub>

Supplement: d0ay02248a7.pdf [file d0ay02248a7.pdf]

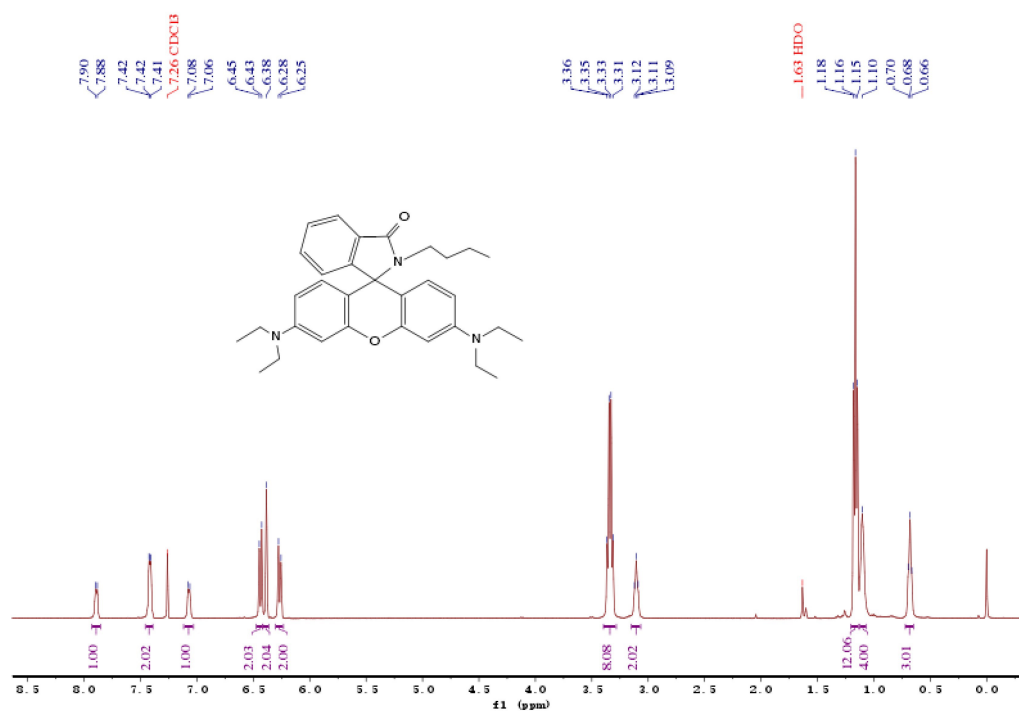

Fig. S7  $^1\text{H}$  NMR spectrum of intermediate **1**

Supplement: d0ay02248a8.pdf [file d0ay02248a8.pdf]

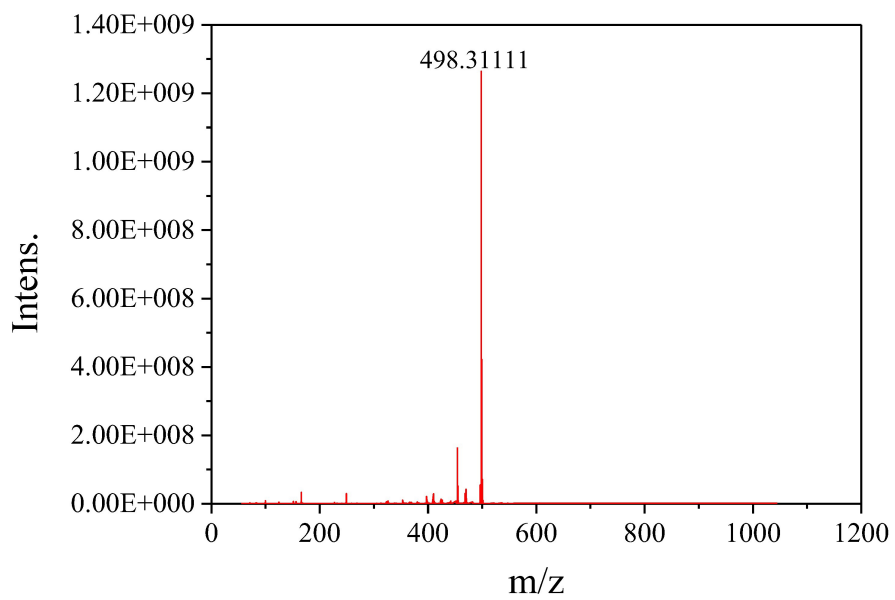

Fig. S8 ESI-MS spectrum of intermediate **1**

Supplement: d0ay02248a9.pdf [file d0ay02248a9.pdf]
